# Supplementary material
Source: Elsevier journal article supplement (https://www.sciencedirect.com/science/article/pii/S1885585725002221)
Supplement: mmc1 [file mmc1.pdf]

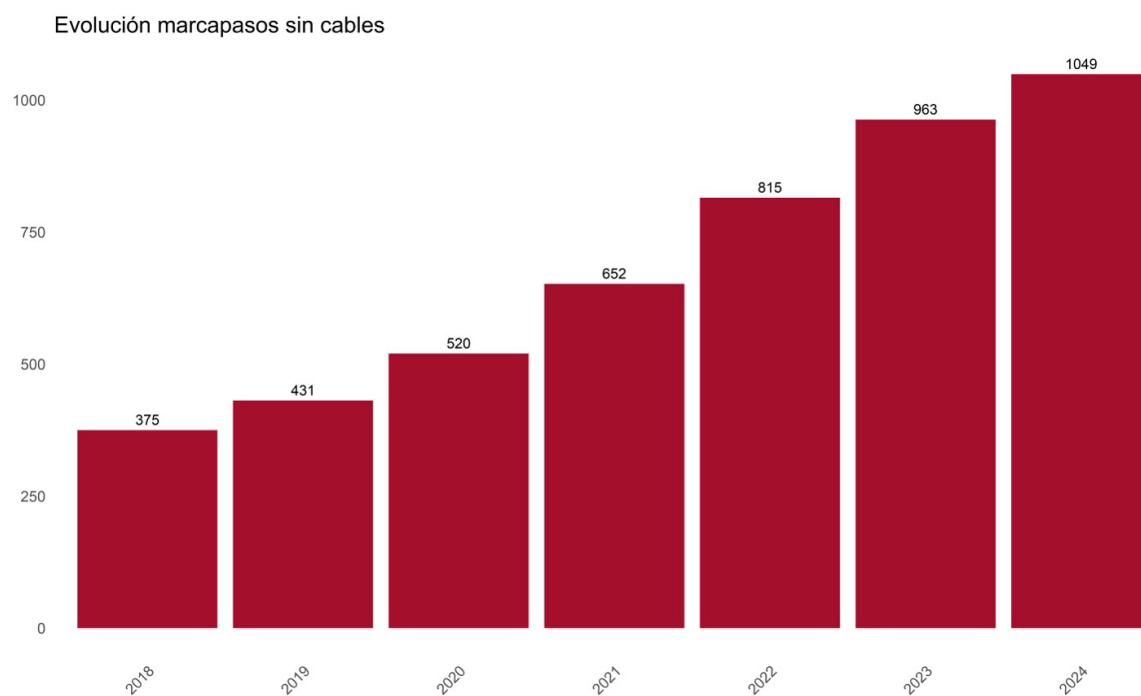

**Figura 1 del material adicional.** Implantes de marcapasos sin cables, 2018-2024.

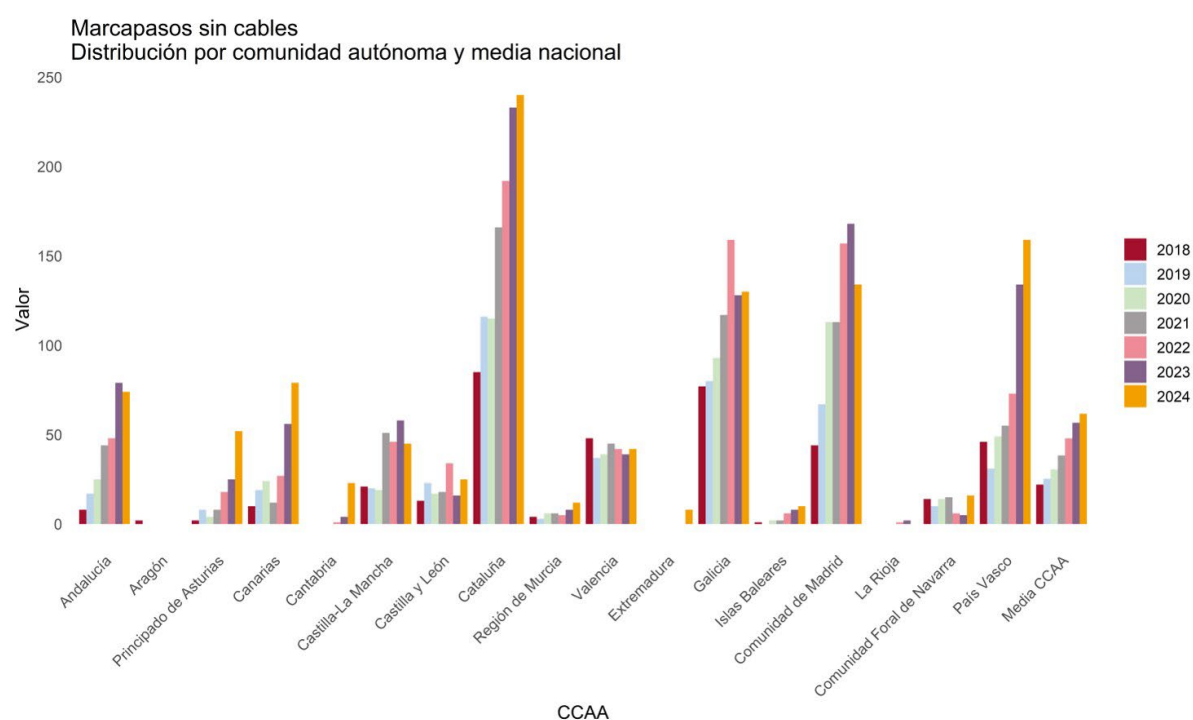

**Figura 2 del material adicional.** Distribución por comunidades autónomas de los implantes de marcapasos sin cables, 2018-2024.
